# Supplementary material for: Flexible triboelectric nanogenerator based on polyester conductive cloth for biomechanical energy harvesting and self-powered sensors
Source: Royal Society of Chemistry journal article supplement (doi:10.1039/d1nr05129f), 2021-01-01
Supplement: d1nr05129f1.pdf [file d1nr05129f1.pdf]

**Electronic Supplementary Information for**  
**Flexible Triboelectric Nanogenerator Based on Polyester Conductive**  
**Cloth for Biomechanical Energy Harvesting and Self-Powered**  
**Sensors**

Junwei Zhao,<sup>a,c\*</sup> Yujiang Wang,<sup>a</sup> Xiaojiang Song,<sup>a</sup> Anqi Zhou,<sup>a</sup> Yunfei Ma,<sup>a</sup> Xin Wang<sup>b\*</sup>

<sup>a</sup> Henan Key Laboratory of Special Protective Materials, Materials Science and Engineering School, Luoyang Institute of Science and Technology, Luoyang, 471023, P. R. China.

<sup>b</sup> Henan Key Laboratory of Photovoltaic Materials, Henan University, Kaifeng 475004, P. R. China.

<sup>c</sup> Henan Province International Joint Laboratory of Materials for Solar Energy Conversion and Lithium Sodium based Battery, Luoyang Institute of Science and Technology, Luoyang, 471023, P. R. China.

E-mail: (J. Zhao) [jwzhao2010@lit.edu.cn](mailto:jwzhao2010@lit.edu.cn); (X. Wang) [xwang2008@vip.henu.edu.cn](mailto:xwang2008@vip.henu.edu.cn)

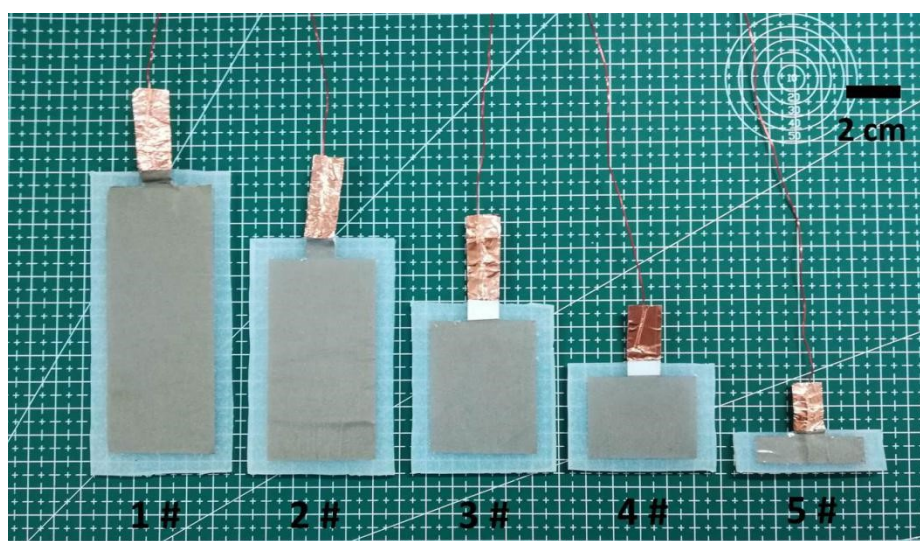

**Figure S1.** Photograph of the five S-TENGs.

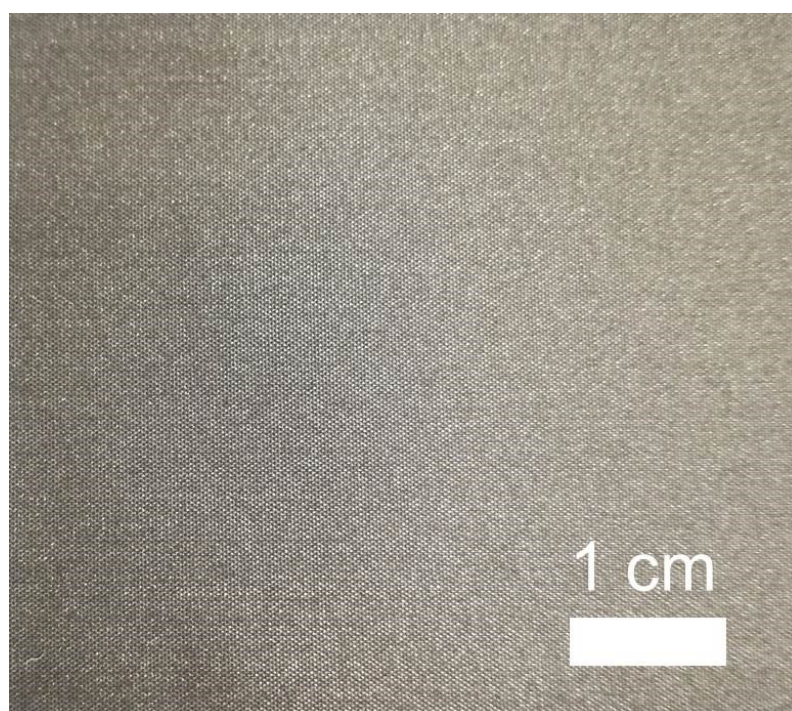

**Figure S2.** Photograph of the polyester conductive cloth.

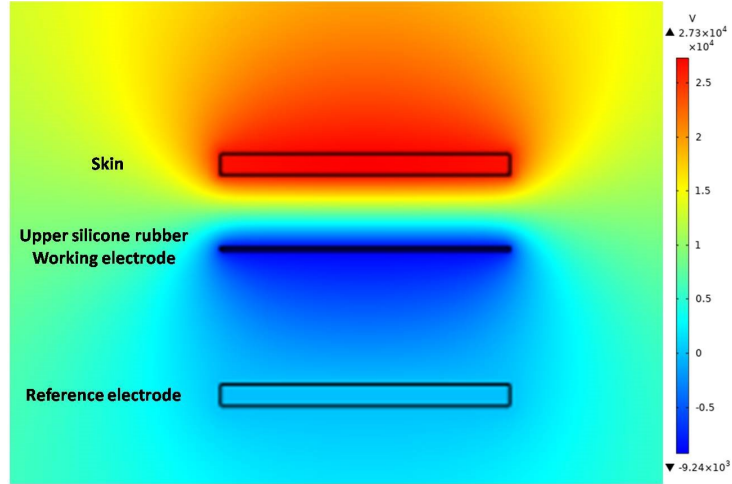

**Figure S3.** The simulated potential distribution under open circuit condition: Separation distance ( $d$ ) = 10 mm, Electrode length ( $l$ ) = 40 mm and charge density ( $\sigma$ ) =  $45 \mu\text{C}/\text{m}^2$ .

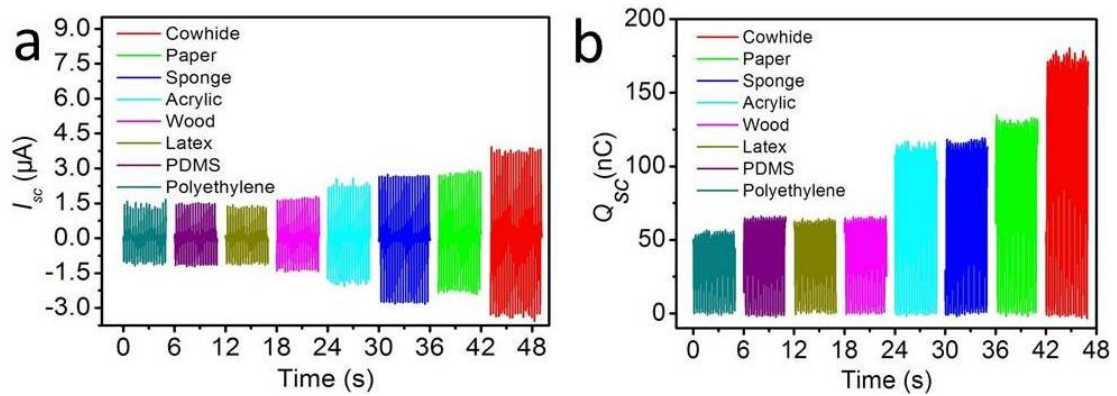

**Figure S4.** The output of  $I_{sc}$  (a), and  $Q_{sc}$  (b) of relative contact-separation motion of the 1# S-TENG to different materials.

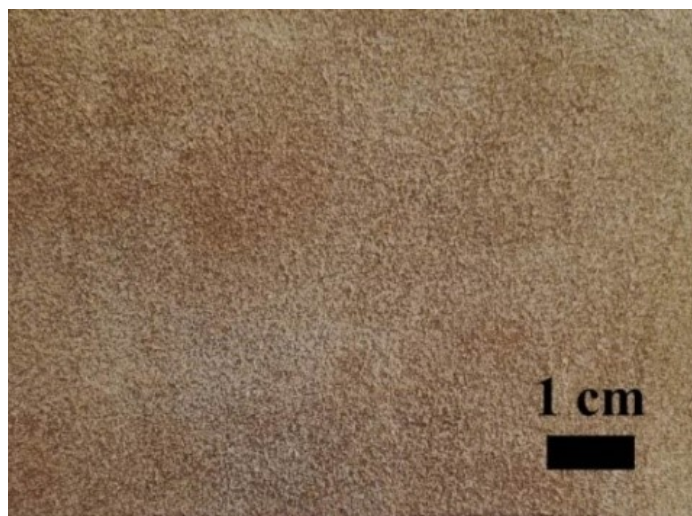

**Figure S5.** Photograph of the defatted cowhide.

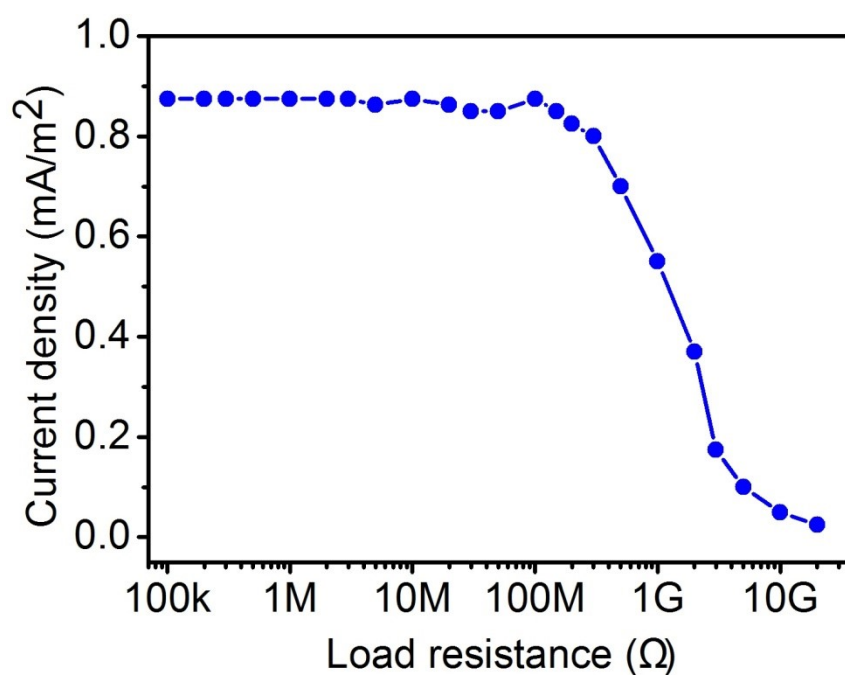

**Figure S6.** The resistance dependence of the current density of the 1# TENG (3.0 Hz) at different external load resistances.

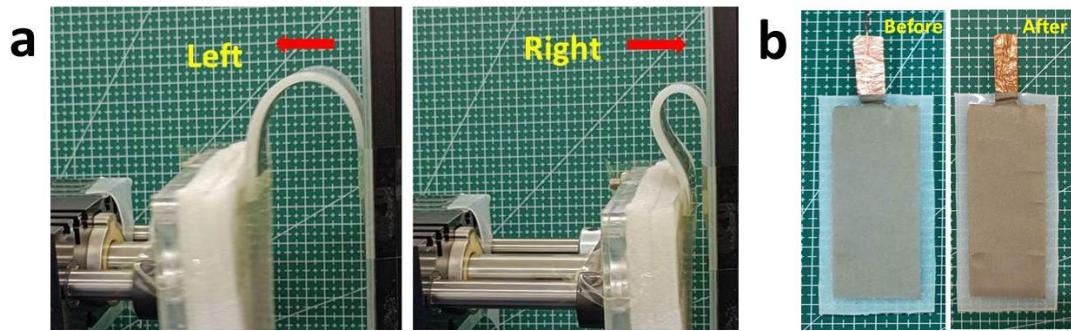

**Figure S7.** The cyclic bending stability of the 1# S-TENG. (a) Photographs of the experiment process. (b) Photographs of samples before and after bending experiments

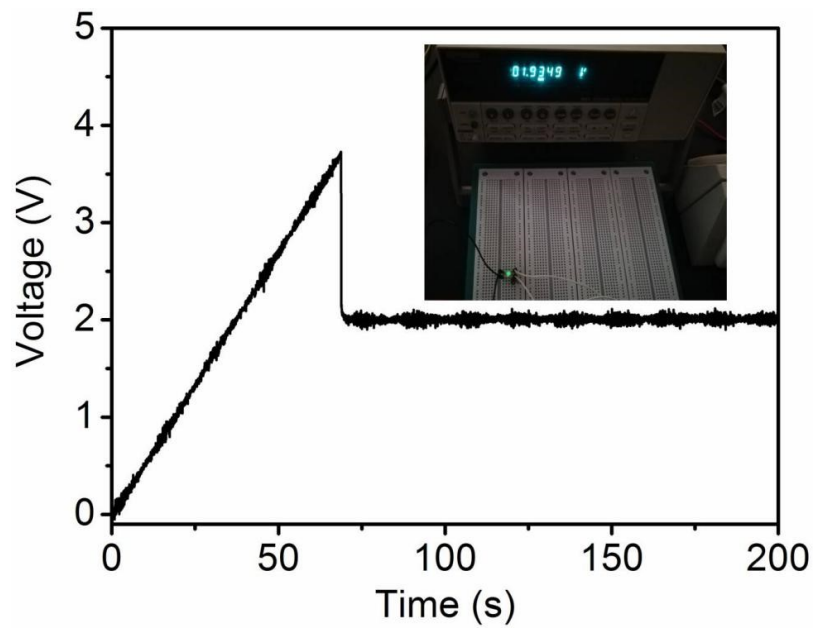

**Figure S8.** The real-time charging and discharging curve of a 10  $\mu\text{F}$  capacitor for lighting up an LED.

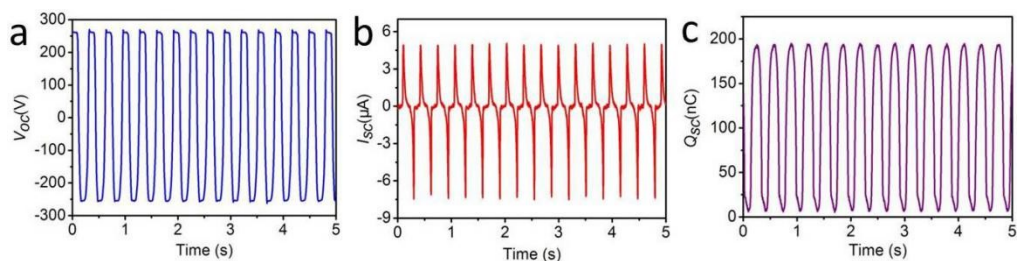

**Figure S9.** The  $V_{oc}$  (a),  $I_{sc}$ (b), and  $Q_{sc}$ (c) of the 1# S-TENG with sponge as a triboelectrically positive material (3.0 Hz).

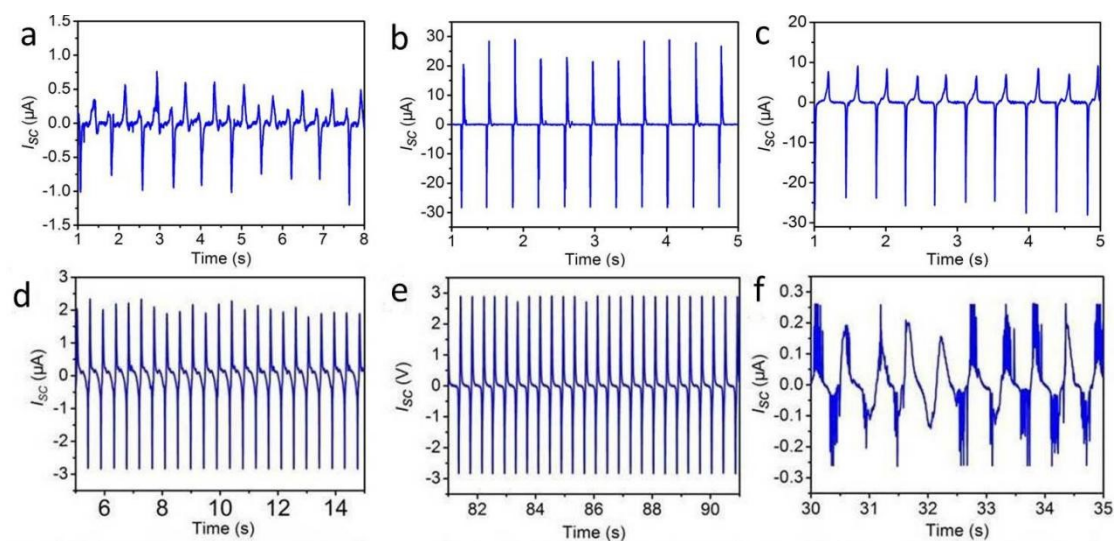

**Figure S10.** Biomechanical energy-harvesting performances of S-TENG. The  $I_{sc}$  generated by (a) bending and releasing of wrist, (b)hand tapping, (c) walking of a human volunteer,(d) cuff tapping of coat, and cuff (e)tapping and (f) swing of polyamide sweater.

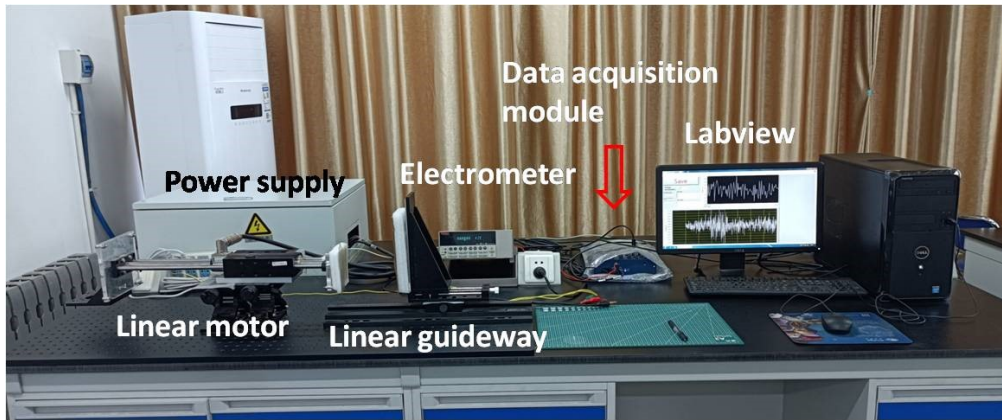

**Figure S11.** Photograph of testing system.

## **Supporting Movies**

**Supporting Movie S1.** Demonstration of 240 LEDs lighted up by the 1# S-TENG after rectification (3.0 Hz).

**Supporting Movie S2.** Two green LEDs can be continuously lighted up by a charged 10  $\mu\text{F}$  capacitor.

**Supporting Movie S3.** Sustainably driving an electronic watch with a capacitor (10  $\mu\text{F}$ ) charged by the 1# TENG.

**Supporting Movie S4.** Sustainably driving a calculator with a capacitor (33 $\mu\text{F}$ ) charged by the 1# TENG.

**Supporting Movie S5.** 150 LEDs powered by the 1# TENG harvesting energy from simulated walking.

**Supporting Movie S6.** 90 LEDs powered by the 1# TENG harvesting energy from cuff tapping of wool coat.

**Supporting Movie S7.** 90 LEDs powered by the 1# TENG harvesting energy from cuff tapping of polyamide sweater.

**Supporting Movie S8.** 30 LEDs powered by the 1# TENG harvesting energy from cuff swing of polyamide sweater.

**Supporting Movie S9.** The real-time voltage signals for monitoring finger motion.

**Supporting Movie S10.** The real-time voltage signals for monitoring occlusal muscle motion.

**Supporting Movie S11.** The real-time voltage signals for monitoring diaphragmatic breathing.
